# Supplementary material for: Raman spectroscopic detection of carotenoids in cattle skin
Source: Royal Society of Chemistry journal article supplement (doi:10.1039/d0ra03147j), 2020-01-01
Supplement: d0ra03147j1.pdf [file d0ra03147j1.pdf]

Supporting Information

### Raman spectroscopic detection of carotenoids in cattle skin

\*Correspondence to Megha Mehta: (Email: [megha.mehta@lasra.co.nz](mailto:megha.mehta@lasra.co.nz))

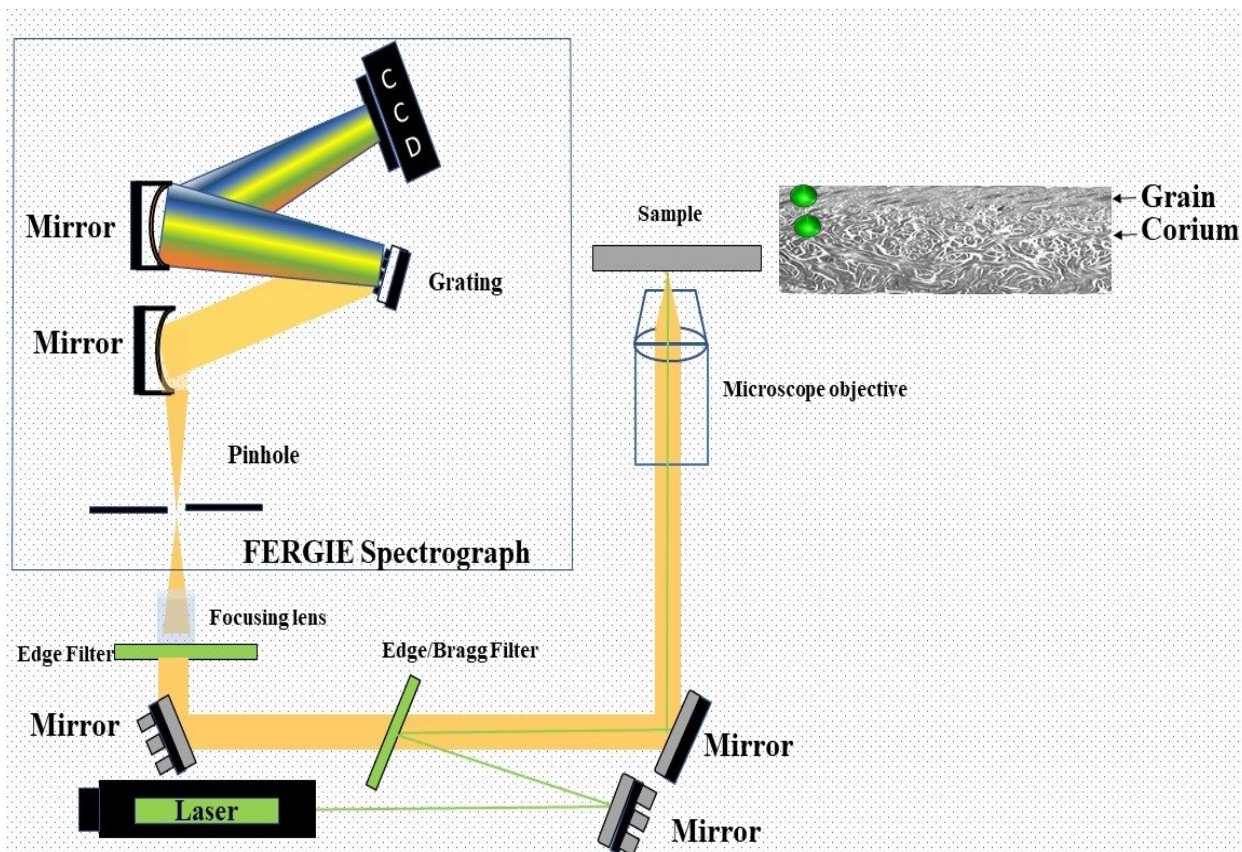

**Fig. S1** Illustration of Raman spectroscopy hardware and setup with hide sample.

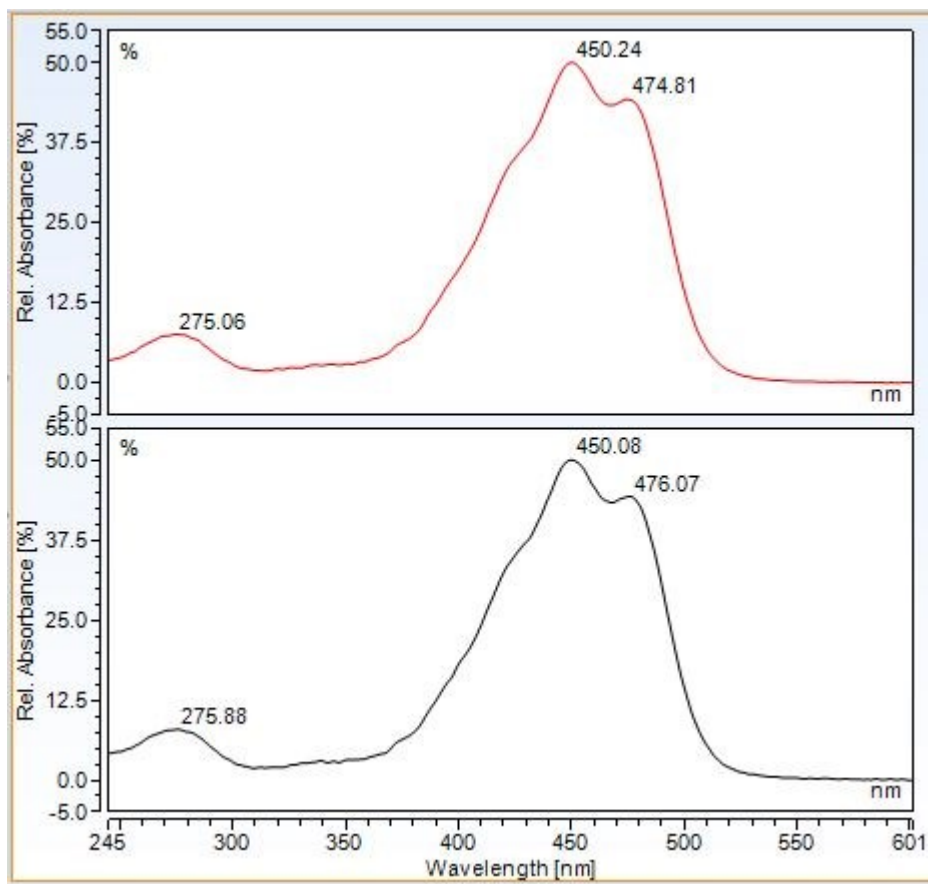

**Fig. S2** UV scan of carotenoid external standard (top) and carotenoid extracted from the sample (bottom).

**Table S1. Tentative assignments of Raman bands (grain and corium layer of cattle hide)**

| <b>Position of character peak (cm<sup>-1</sup>)</b> | <b>Biochemical Assignments</b>                  | <b>Biomolecular Assignments</b> | <b>Skin layer</b>        |
|-----------------------------------------------------|-------------------------------------------------|---------------------------------|--------------------------|
| <b>515</b>                                          | S-S stretch                                     | Keratin                         | <b>GRAIN</b>             |
| <b>567</b>                                          | N-H stretch                                     | Cytosine or Guanine             | <b>CORIUM</b>            |
| <b>872-873</b>                                      | $\nu$ C-C Hydroxyproline                        | Protein (collagen)              | <b>GRAIN,<br/>CORIUM</b> |
| <b>938</b>                                          | $\nu$ C-C Proline and valine ( $\alpha$ -helix) | Protein (collagen)              | <b>CORIUM</b>            |
| <b>956</b>                                          | $\delta$ CH <sub>3</sub> (deformed)             | Lipid, protein                  | <b>GRAIN</b>             |
| <b>1001-1004</b>                                    | $\nu$ C-CH <sub>3</sub> ring breathing          | Phenylalanine,<br>Carotenoids   | <b>GRAIN</b>             |
| <b>1084-1095</b>                                    | $\nu$ -O-P-O-,<br>$\nu$ C-C phospholipid        | Nucleic acid (DNA, RNA)         | <b>CORIUM</b>            |
| <b>1151.00</b>                                      | $\nu$ C-C                                       | Carotenoids                     | <b>GRAIN</b>             |

|                  |                                                                                      |                                                |                      |
|------------------|--------------------------------------------------------------------------------------|------------------------------------------------|----------------------|
| <b>1243</b>      | Amino compound III ( $\beta$ fold)                                                   |                                                | <b>CORIUM</b>        |
| <b>1267</b>      | Amino compound III ( $\alpha$ -helix)                                                |                                                | <b>GRAIN</b>         |
| <b>1288–1304</b> | Lipid $\text{CH}_2$ bending vibration and bending vibration $\text{CH}_2\text{CH}_3$ |                                                | <b>CORIUM</b>        |
| <b>1351</b>      | Carbon particle                                                                      |                                                | <b>GRAIN</b>         |
| <b>1388</b>      | $\text{CH}_3$ band                                                                   |                                                | <b>GRAIN</b>         |
| <b>1441-1449</b> | $\delta\text{CH}_2$ (bending) proteins and lipids                                    | Protein, Lipid                                 | <b>GRAIN, CORIUM</b> |
| <b>1518-1522</b> | $\nu \text{C}=\text{C}$                                                              | Carotenoids                                    | <b>GRAIN, CORIUM</b> |
| <b>1588</b>      | $\nu \text{C}-\text{C}$ aromatic ring                                                | Melanin                                        | <b>GRAIN</b>         |
| <b>1654,1657</b> | Amino compounds I, $\alpha$ helix                                                    | Protein                                        | <b>CORIUM</b>        |
| <b>1744</b>      | $\text{C}=\text{O}$ stretch                                                          | Carbonyl feature of lipid spectra, Ester group | <b>CORIUM</b>        |

|                  |                    |                                             |                      |
|------------------|--------------------|---------------------------------------------|----------------------|
| <b>2154</b>      | $\nu$ C $\equiv$ N |                                             | <b>GRAIN</b>         |
| <b>2305-3100</b> | $\nu$ C-H          | CH <sub>3</sub> symmetric stretch of lipids | <b>GRAIN, CORIUM</b> |

$\nu$ : stretching vibration,  $\nu_{as}$ : asymmetric stretching vibration,  $\nu_s$ : symmetric stretching vibration,  $\delta$ : bending, deformed, swing (relative peak intensity = the peak intensity/average intensity of the full spectrum).

**Table S2: Distribution of biochemical components in Grain and Corium Layers of hide.**

| Number         | Normalised Intensity |        |          |        |             |        |
|----------------|----------------------|--------|----------|--------|-------------|--------|
|                | Lipids               |        | Proteins |        | Carotenoids |        |
|                | Grain                | Corium | Grain    | Corium | Grain       | Corium |
| 1              | 0.042                | 0.049  | 0.06     | 0.029  | 0.23        | 0.008  |
| 2              | 0.047                | 0.041  | 0.06     | 0.040  | 0.22        | 0.01   |
| 3              | 0.035                | 0.046  | 0.07     | 0.042  | 0.26        | 0.007  |
| 4              | 0.027                | 0.043  | 0.08     | 0.048  | 0.26        | 0.010  |
| <b>Average</b> | 0.0380               | 0.045  | 0.07     | 0.040  | 0.24        | 0.009  |
| <b>SD</b>      | 0.0085               | 0.0035 | 0.00     | 0.0079 | 0.019       | 0.0019 |

**Table S3: HPLC results for correlation with Raman results.**

| Sample | Grain layer<br>$\beta$ -carotene concentration ( $\mu\text{g}/\text{mg}$ ) |
|--------|----------------------------------------------------------------------------|
| 37     | 0.04957                                                                    |
| 59     | 0.04513                                                                    |
| 42     | 0.04042                                                                    |
| 55     | 0.02982                                                                    |
| 57     | 0.03962                                                                    |
| 66     | 0.01317                                                                    |
| 31     | 0.02451                                                                    |
| 26     | 0.03579                                                                    |
| 44     | 0.01710                                                                    |
| 40     | 0.02013                                                                    |
| 43     | 0.03690                                                                    |
| 54     | 0.03276                                                                    |
| 27     | 0.0501                                                                     |
| 28     | 0.1075                                                                     |
| 29     | 0.0534                                                                     |
| 30     | 0.082                                                                      |
| 32     | 0.0917                                                                     |
| 33     | 0.1217                                                                     |
| 34     | 0.0265                                                                     |
| 35     | 0.1156                                                                     |
| 36     | 0.0681                                                                     |
| 52     | 0.1808                                                                     |
| 39     | 0.0546                                                                     |
| 41     | 0.0585                                                                     |
| 46     | 0.0259                                                                     |
| 50     | 0.0307                                                                     |
| 51     | 0.0326                                                                     |
| 53     | 0.0605                                                                     |
| 56     | 0.0546                                                                     |
| 58     | 0.0451                                                                     |
| 48     | 0.039                                                                      |
| 61     | 0.2257                                                                     |
| 62     | 0.0607                                                                     |
| 63     | 0.0916                                                                     |
| 64     | 0.0418                                                                     |
| 67     | 0.0217                                                                     |
